# Supplementary material for: Unraveling Connective Tissue Growth Factor as a Therapeutic Target and Assessing Kahweol as a Potential Drug Candidate in Triple-Negative Breast Cancer Treatment
Source: MDPI journal article supplement (doi:10.3390/ijms242216307), 2023-11-14
Supplement: s1 [file s1]

SI Table S1. Characteristics of TNBC patients with CTGF expression level

|                                                     | CTGF_High<br>(N=65) | CTGF_Low<br>(N=32) | p-value |
|-----------------------------------------------------|---------------------|--------------------|---------|
| <b>Age</b>                                          | 53.3 ± 13.0         | 56.3 ± 11.3        | 0.271   |
| <b>Status</b>                                       |                     |                    | 0.077   |
| - 0:Living                                          | 53 (81.5%)          | 31 (96.9%)         |         |
| - 1:Dead                                            | 12 (18.5%)          | 1 ( 3.1%)          |         |
| <b>Pathologic stage</b>                             |                     |                    | 0.631   |
| - stage i                                           | 12 (18.8%)          | 5 (15.6%)          |         |
| - stage ii                                          | 42 (65.6%)          | 21 (65.6%)         |         |
| - stage iii                                         | 7 (10.9%)           | 6 (18.8%)          |         |
| - stage iv                                          | 2 ( 3.1%)           | 0 ( 0.0%)          |         |
| - stage x                                           | 1 ( 1.6%)           | 0 ( 0.0%)          |         |
| <b>T stage</b>                                      |                     |                    | 0.725   |
| - t1                                                | 15 (23.1%)          | 7 (21.9%)          |         |
| - t2                                                | 44 (67.7%)          | 21 (65.6%)         |         |
| - t3                                                | 4 ( 6.2%)           | 4 (12.5%)          |         |
| - t4                                                | 1 ( 1.5%)           | 0 ( 0.0%)          |         |
| - t5                                                | 1 ( 1.5%)           | 0 ( 0.0%)          |         |
| <b>N stage</b>                                      |                     |                    | 0.892   |
| - n0                                                | 42 (64.6%)          | 19 (59.4%)         |         |
| - n1                                                | 16 (24.6%)          | 9 (28.1%)          |         |
| - n2                                                | 4 ( 6.2%)           | 3 ( 9.4%)          |         |
| - n3                                                | 3 ( 4.6%)           | 1 ( 3.1%)          |         |
| <b>M stage</b>                                      |                     |                    | 0.78    |
| - mx                                                | 1 ( 1.5%)           | 0 ( 0.0%)          |         |
| - m0                                                | 62 (95.4%)          | 31 (96.9%)         |         |
| - m1                                                | 2 ( 3.1%)           | 1 ( 3.1%)          |         |
| <b>Race</b>                                         |                     |                    | 0.852   |
| - asian                                             | 4 ( 6.5%)           | 1 ( 3.6%)          |         |
| - black or african american                         | 8 (12.9%)           | 4 (14.3%)          |         |
| - white                                             | 50 (80.6%)          | 23 (82.1%)         |         |
| <b>ER status</b>                                    |                     |                    | 0.565   |
| - negative                                          | 56 (87.5%)          | 25 (80.6%)         |         |
| - positive                                          | 8 (12.5%)           | 6 (19.4%)          |         |
| <b>PR status</b>                                    |                     |                    | 0.247   |
| - indeterminate                                     | 1 ( 1.6%)           | 0 ( 0.0%)          |         |
| - negative                                          | 59 (92.2%)          | 26 (83.9%)         |         |
| - positive                                          | 4 ( 6.2%)           | 5 (16.1%)          |         |
| <b>HER2 immunohistochemistry level</b>              |                     |                    | 0.411   |
| - 0                                                 | 12 (31.6%)          | 5 (31.2%)          |         |
| - 1+                                                | 15 (39.5%)          | 7 (43.8%)          |         |
| - 2+                                                | 11 (28.9%)          | 3 (18.8%)          |         |
| - 3+                                                | 0 ( 0.0%)           | 1 ( 6.2%)          |         |
| <b>HER2 neuimmunohistochemistry receptor status</b> |                     |                    | 0.82    |
| - equivocal                                         | 10 (17.5%)          | 4 (17.4%)          |         |
| - indeterminate                                     | 1 ( 1.8%)           | 0 ( 0.0%)          |         |
| - negative                                          | 41 (71.9%)          | 18 (78.3%)         |         |
| - positive                                          | 5 ( 8.8%)           | 1 ( 4.3%)          |         |
| <b>Days</b>                                         | 1451.0 ± 1620.1     | 1850.7 ± 1875.0    | 0.281   |

SI Table S2. The thirty most significantly upregulated and downregulated DEGs with siControl vs. siCTGF

| Upregulated genes |               |             | Downregulated genes |            |             |
|-------------------|---------------|-------------|---------------------|------------|-------------|
| Gene ID           | Gen symbol    | Fold change | Gene ID             | Gen symbol | Fold change |
| 3162              | HMOX1         | 14.4525345  | 7498                | XDH        | 0.031265893 |
| 101059953         | NPIPA8        | 12.81924248 | 2838                | GPR15      | 0.031613601 |
| 10912             | GADD45G       | 10.65033954 | 79413               | ZBED2      | 0.033886725 |
| 448831            | FRG2          | 7.504160377 | 171425              | CLYBL      | 0.036882476 |
| 2045              | EPHA7         | 7.311635242 | 25984               | KRT23      | 0.039749917 |
| 163479            | FNDC7         | 6.850584216 | 25837               | RAB26      | 0.04144623  |
| 2353              | FOS           | 6.842931565 | 1591                | CYP24A1    | 0.047173183 |
| 6520              | SLC3A2        | 6.706840047 | 284086              | NEK8       | 0.047465365 |
| 353355            | ZNF233        | 6.572475417 | 282969              | FUOM       | 0.052717378 |
| 4703              | NEB           | 6.544985624 | 410                 | ARSA       | 0.063330653 |
| 285220            | EPHA6         | 6.51685324  | 8343                | H2BC7      | 0.063987892 |
| 135458            | HUS1B         | 6.494670841 | 53405               | CLIC5      | 0.0642736   |
| 2139              | EYA2          | 6.430499325 | 3785                | KCNQ2      | 0.067436025 |
| 56155             | TEX14         | 6.423622603 | 9966                | TNFSF15    | 0.068236291 |
| 83729             | INHBE         | 6.134570455 | 2902                | GRIN1      | 0.073049451 |
| 84992             | PIGY          | 6.113645946 | 138429              | PIP5KL1    | 0.079363042 |
| 66000             | TMEM108       | 6.058969832 | 55349               | CHDH       | 0.079494541 |
| 6615              | SNAI1         | 5.994567395 | 51384               | WNT16      | 0.079852867 |
| 93953             | GCNA          | 5.731465109 | 259236              | TMIE       | 0.080123197 |
| 57161             | PELI2         | 5.697211517 | 167359              | NIM1K      | 0.08037963  |
| 1960              | EGR3          | 5.459356999 | 94059               | LENG9      | 0.080554118 |
| 203102            | ADAM32        | 5.327827562 | 4316                | MMP7       | 0.080562454 |
| 100534592         | URGCP-MRPS24  | 5.296230385 | 1003                | CDH5       | 0.08192984  |
| 152206            | CCDC13        | 5.26700851  | 653145              | ANXA8      | 0.082626395 |
| 651               | BMP3          | 5.209817309 | 5551                | PRF1       | 0.082765997 |
| 202333            | CMYA5         | 4.975310505 | 115908              | CTHRC1     | 0.08325064  |
| 2495              | FTH1          | 4.845459329 | 114800              | CCDC85A    | 0.084696781 |
| 51655             | RASD1         | 4.819380427 | 6573                | SLC19A1    | 0.085245388 |
| 5630              | PRPH          | 4.792693043 | 146429              | SLC22A31   | 0.092053572 |
| 109504726         | ERV3-1-ZNF117 | 4.763250988 | 2246                | FGF1       | 0.097543352 |

A

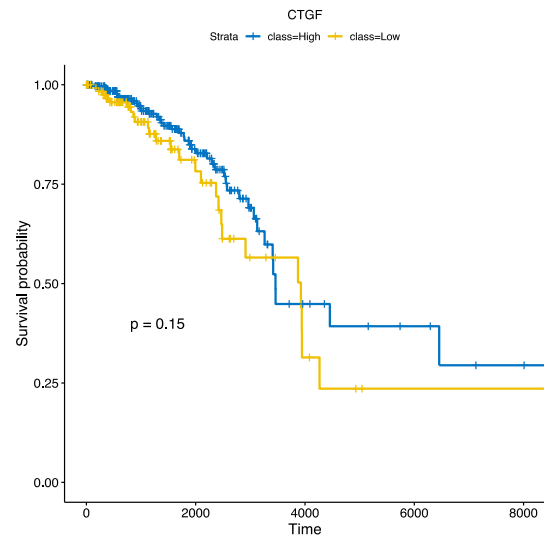

B

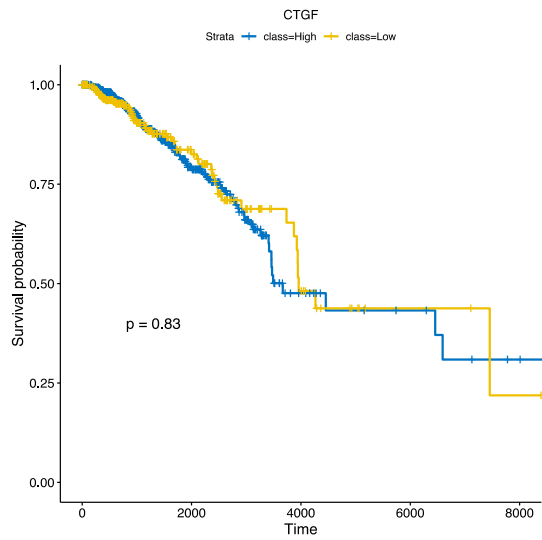

Figure S1. Kaplan Meier survival plots for BRCA and non-TNBC patient groups. (A) Kaplan-Meier survival plot for TCGA BRCA patient groups, CTGF mRNA high expression group (n=285) and low group (n=140). (B) Kaplan-Meier survival plot for the non-TNBC patient group, CTGF mRNA high expression group (n=731) and low group (n=360).

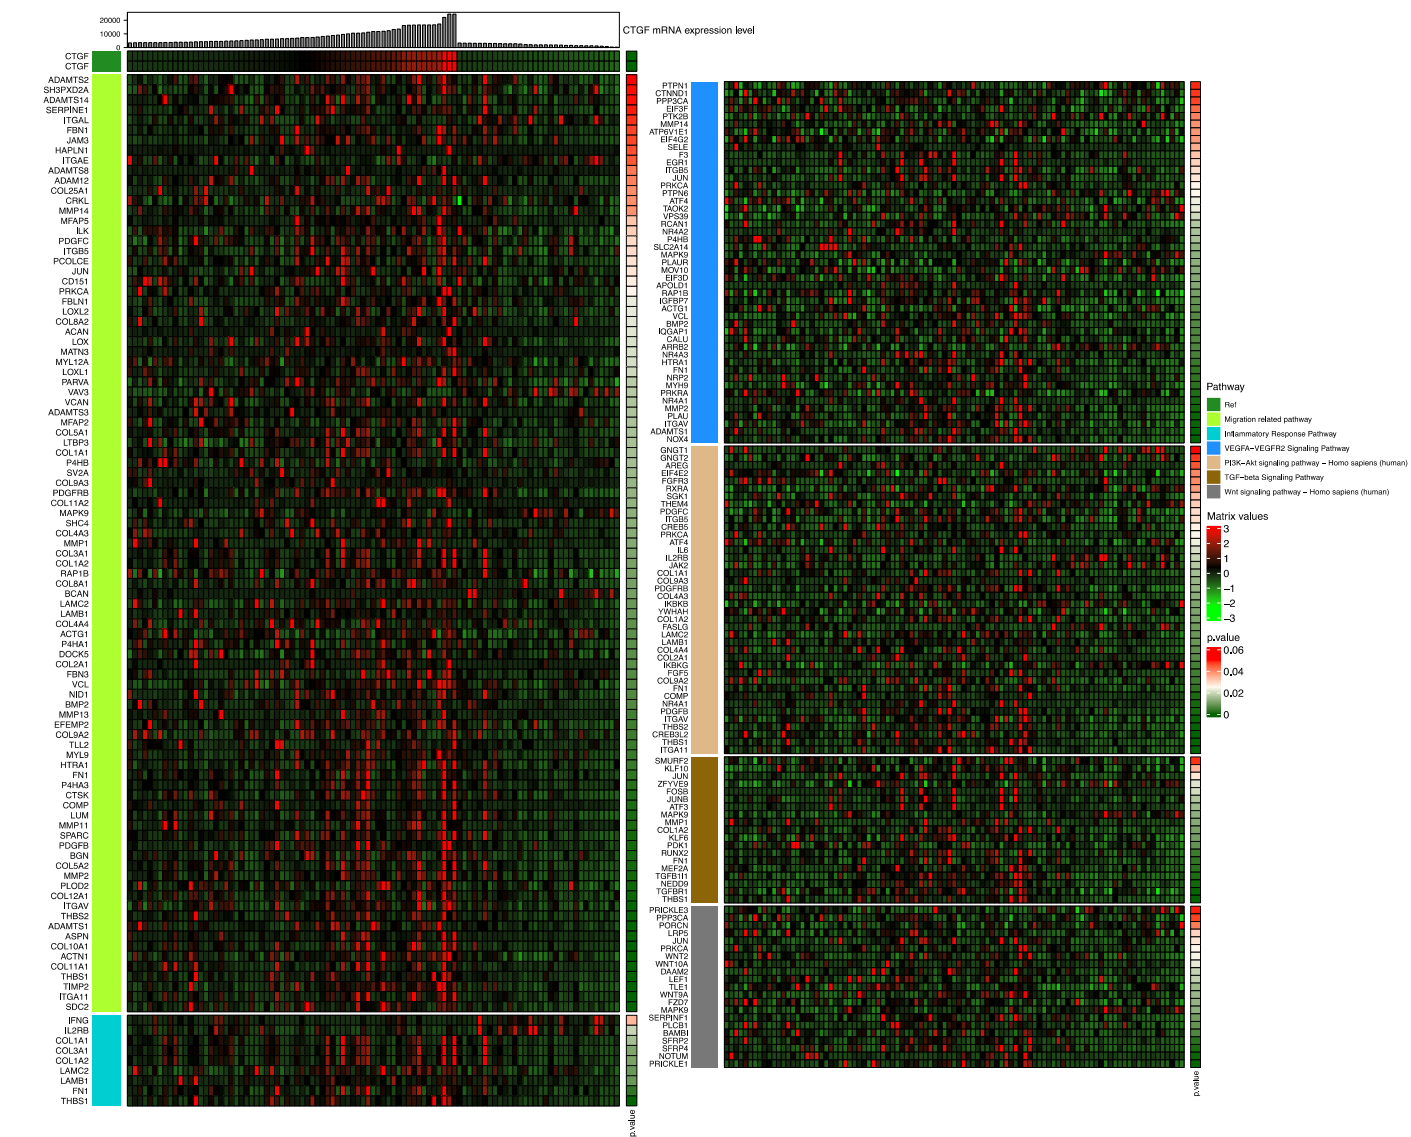

Figure S2. Over-representation analysis for CTGF associated pathways. Heatmap with selected pathways via CPDB (p-value<0.05 in over-representation analysis) based on mRNA expression in TNBC patients (n=97). Top annotation shows CTGF mRNA expression in TNBC patients (n=97). Rows represent the gene list for each selected pathway. Ten selected pathways are indicated next to the heatmap.

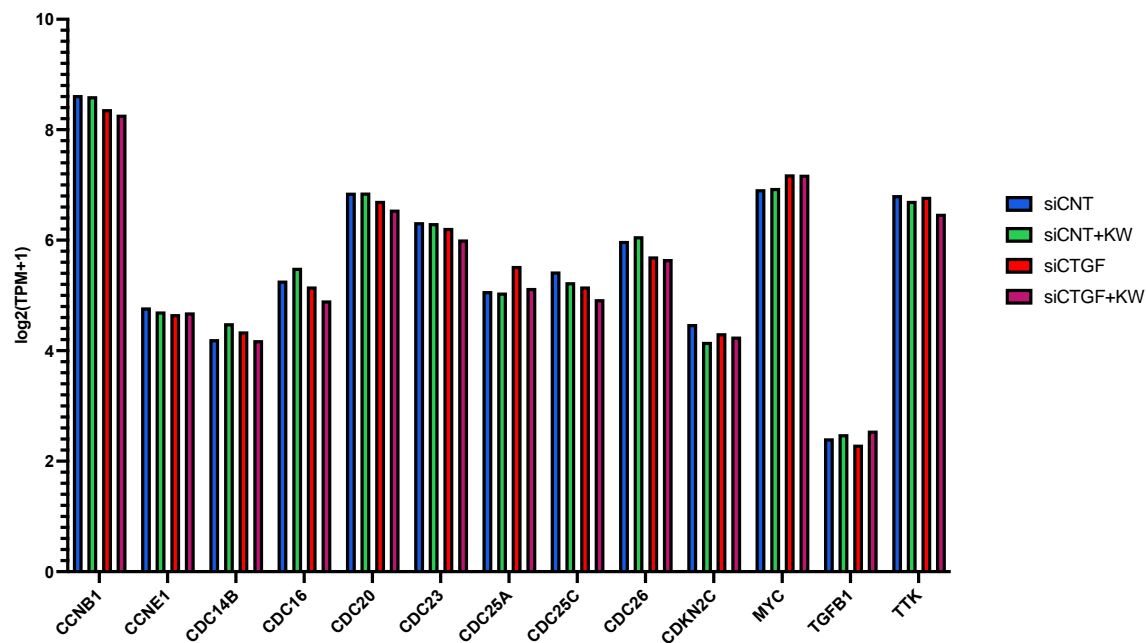

Figure S3. mRNA expression within cell cycle gene sets unaffected by kahweol. In the case of cells transfected with control siRNA, we identified 6174 genes (  $0.7 < FC < 1.3$  ) through the comparison of kahweol treated cells and kahweol non-treated cells. Similarly, we selected 6229 genes (  $0.7 < FC < 1.3$  ) compared between kahweol treated and kahweol non-treated in CTGF siRNA transfected cells. Over-representation analysis was performed by inputting overlapped genes between these gene sets that were unaffected by kahweol, and the prominent outcome pointed to gene sets related to the cell cycle (p-value = 0.002). The representative expression of genes in the cell cycle gene sets are visualized.

Supplementary Figure S4

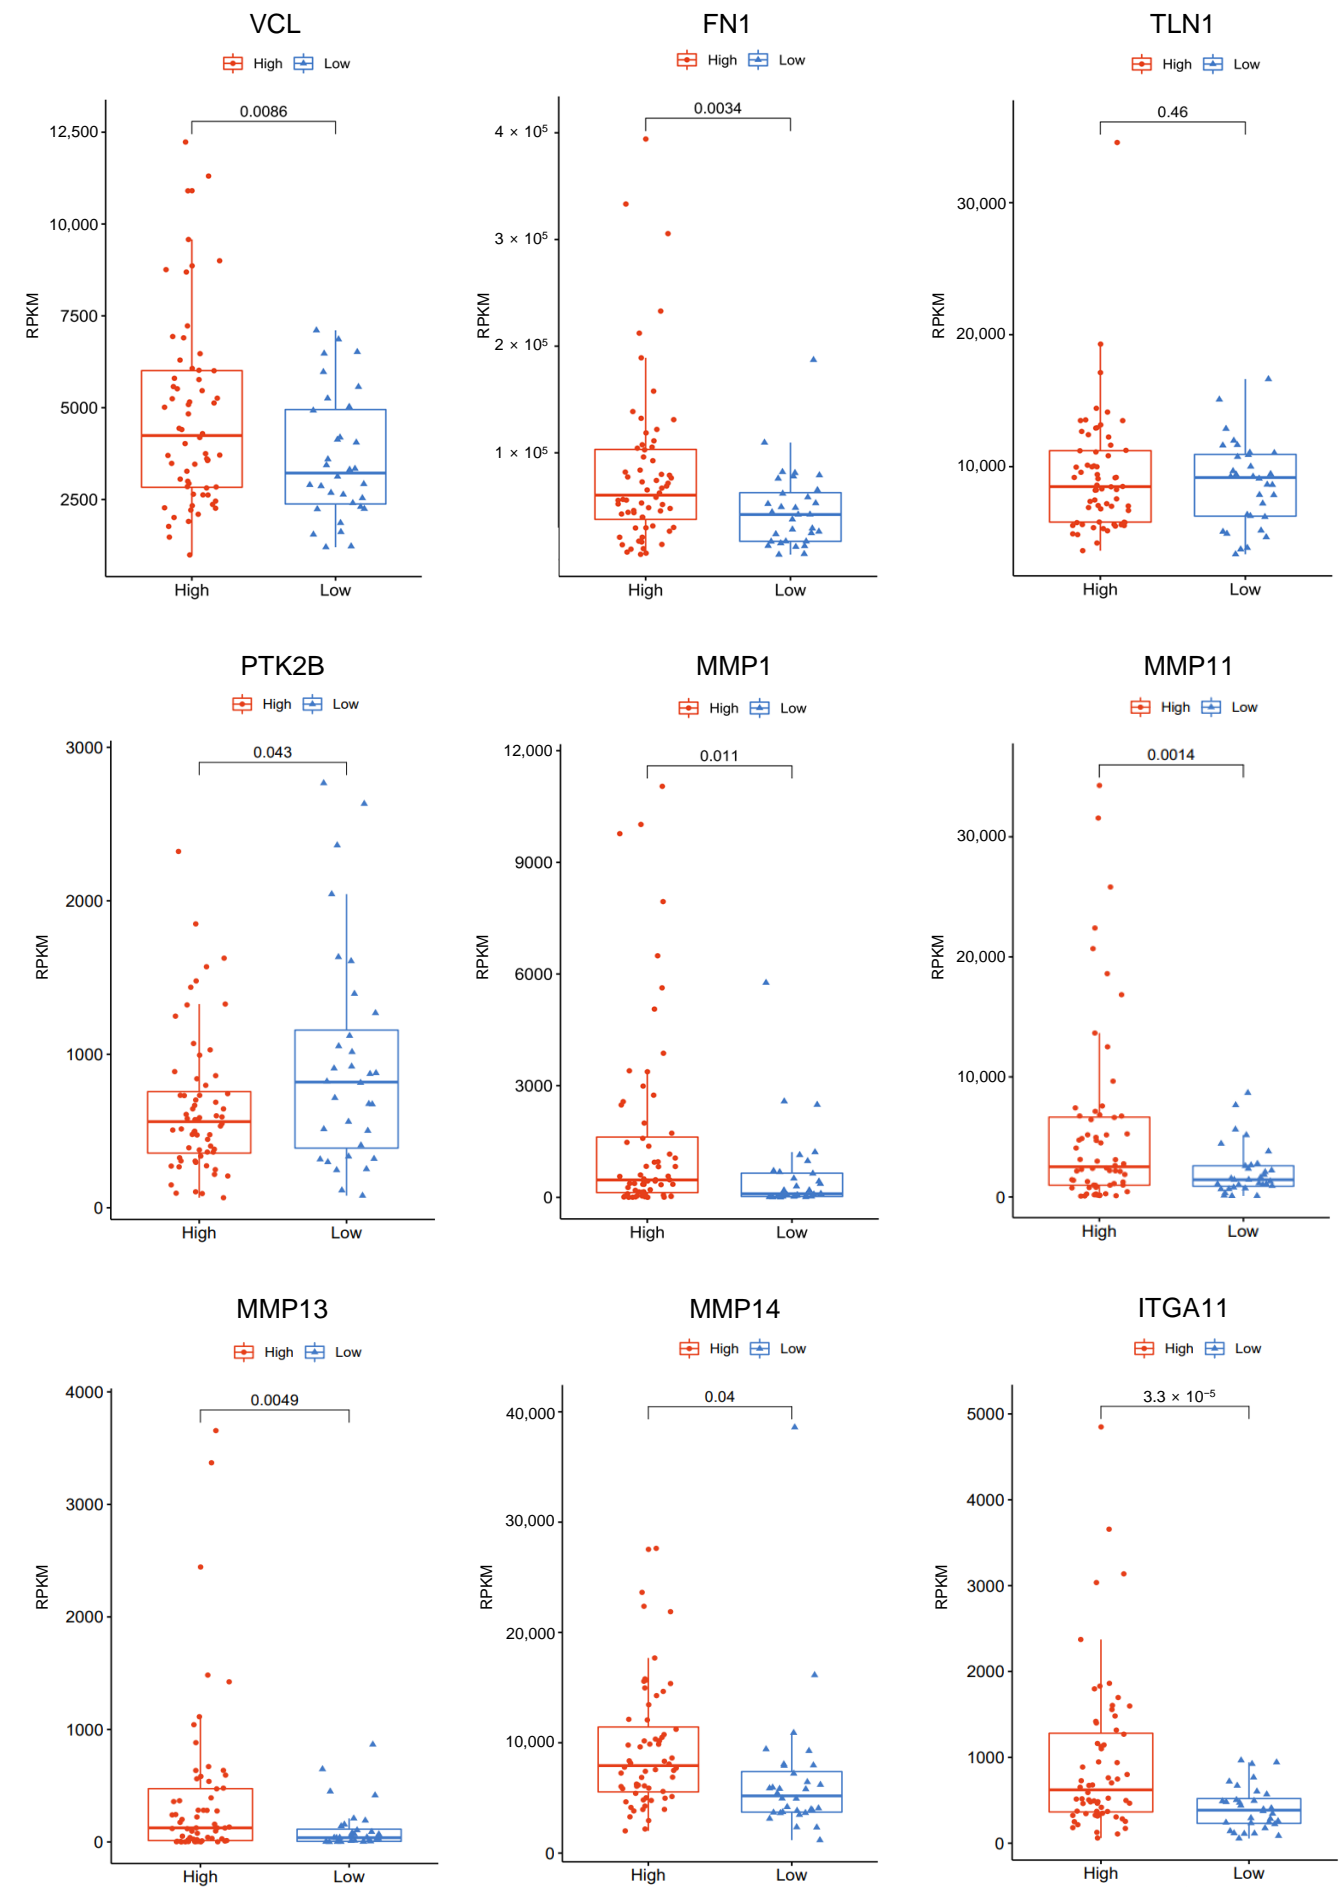

Supplementary Figure S4

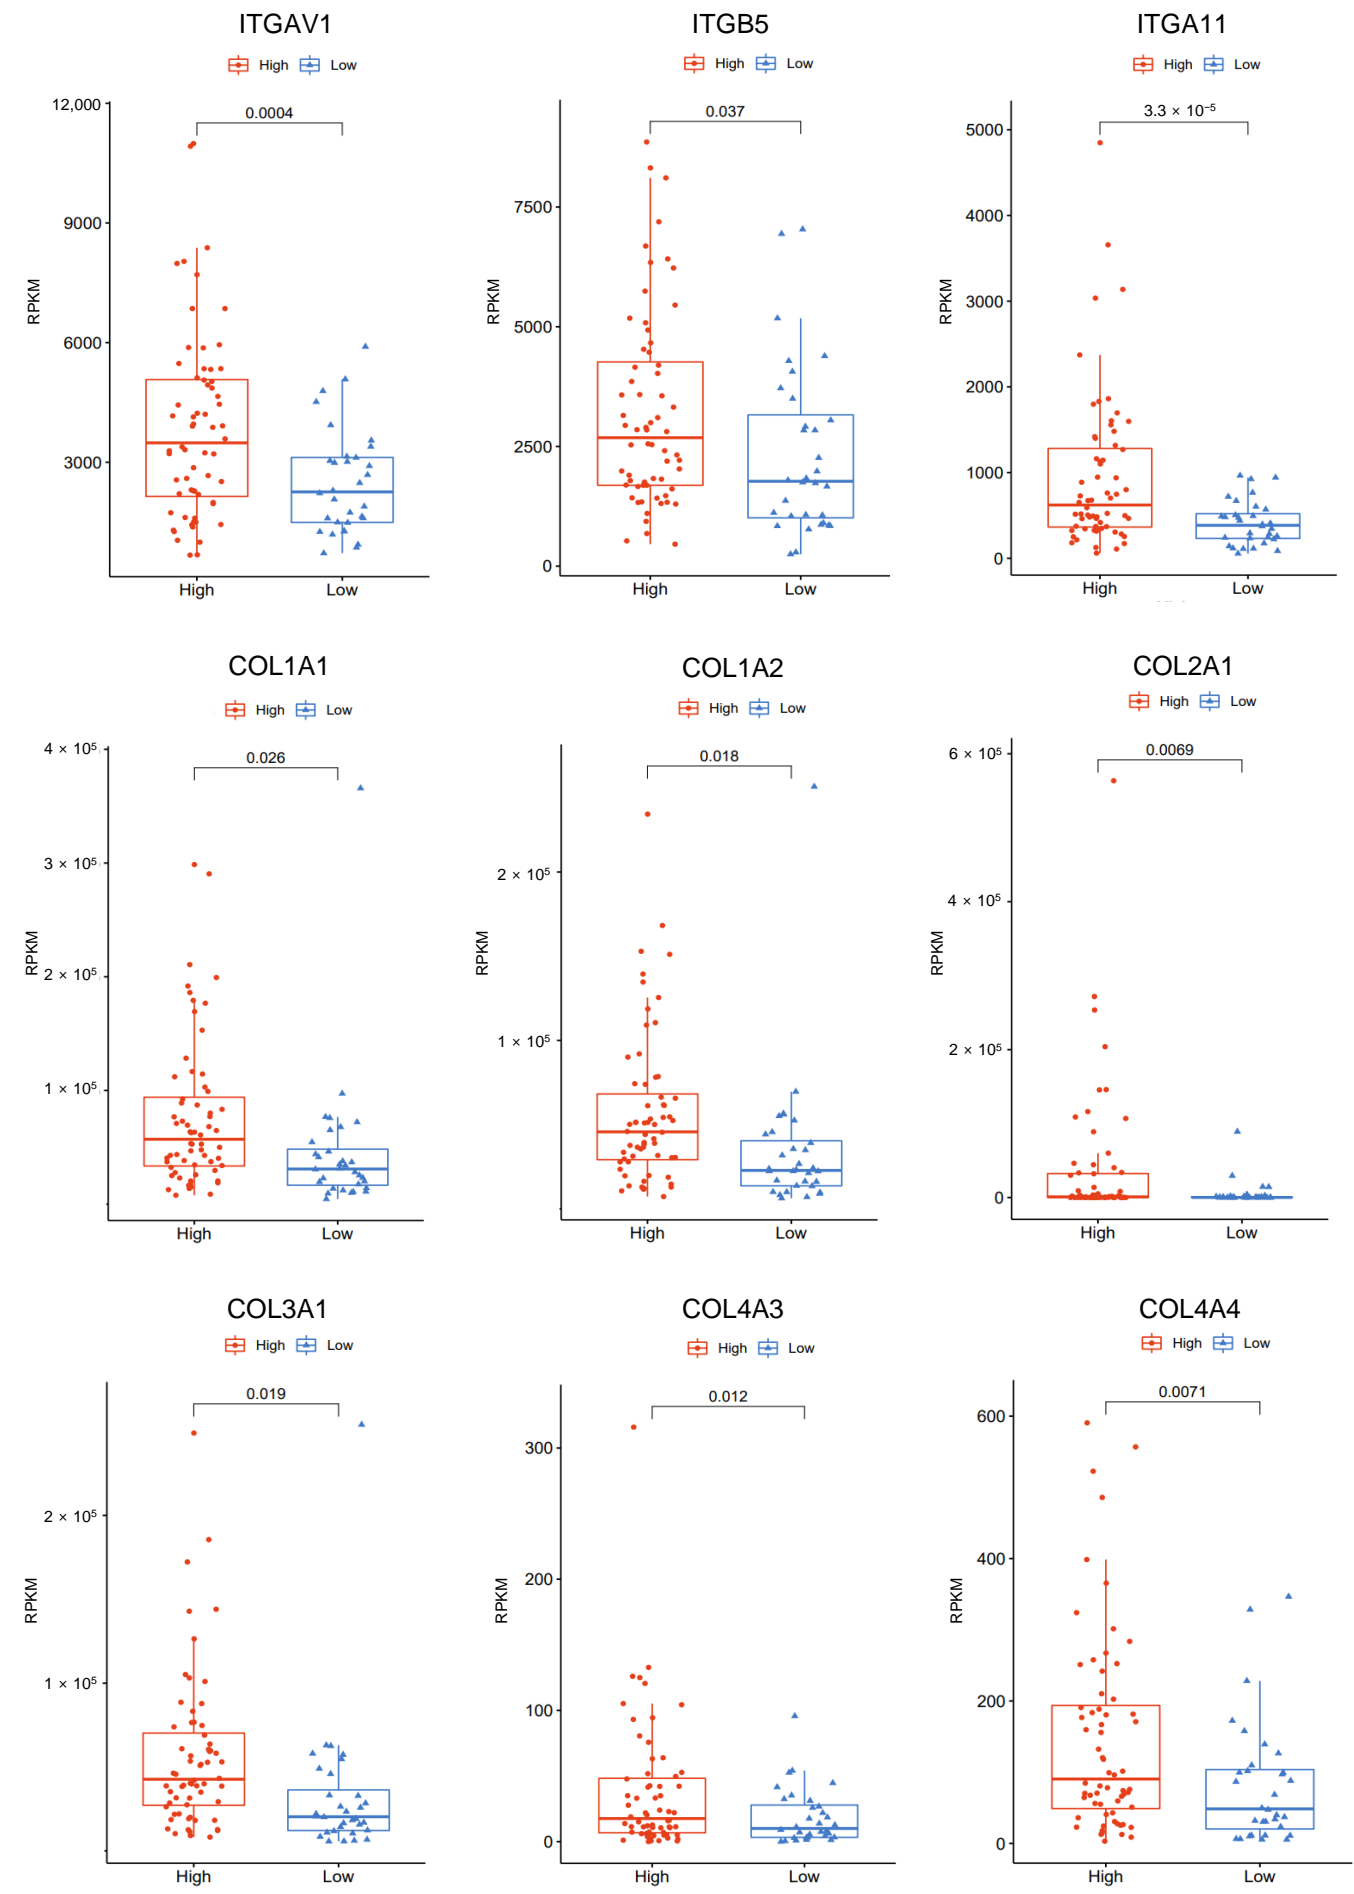

Supplementary Figure S4

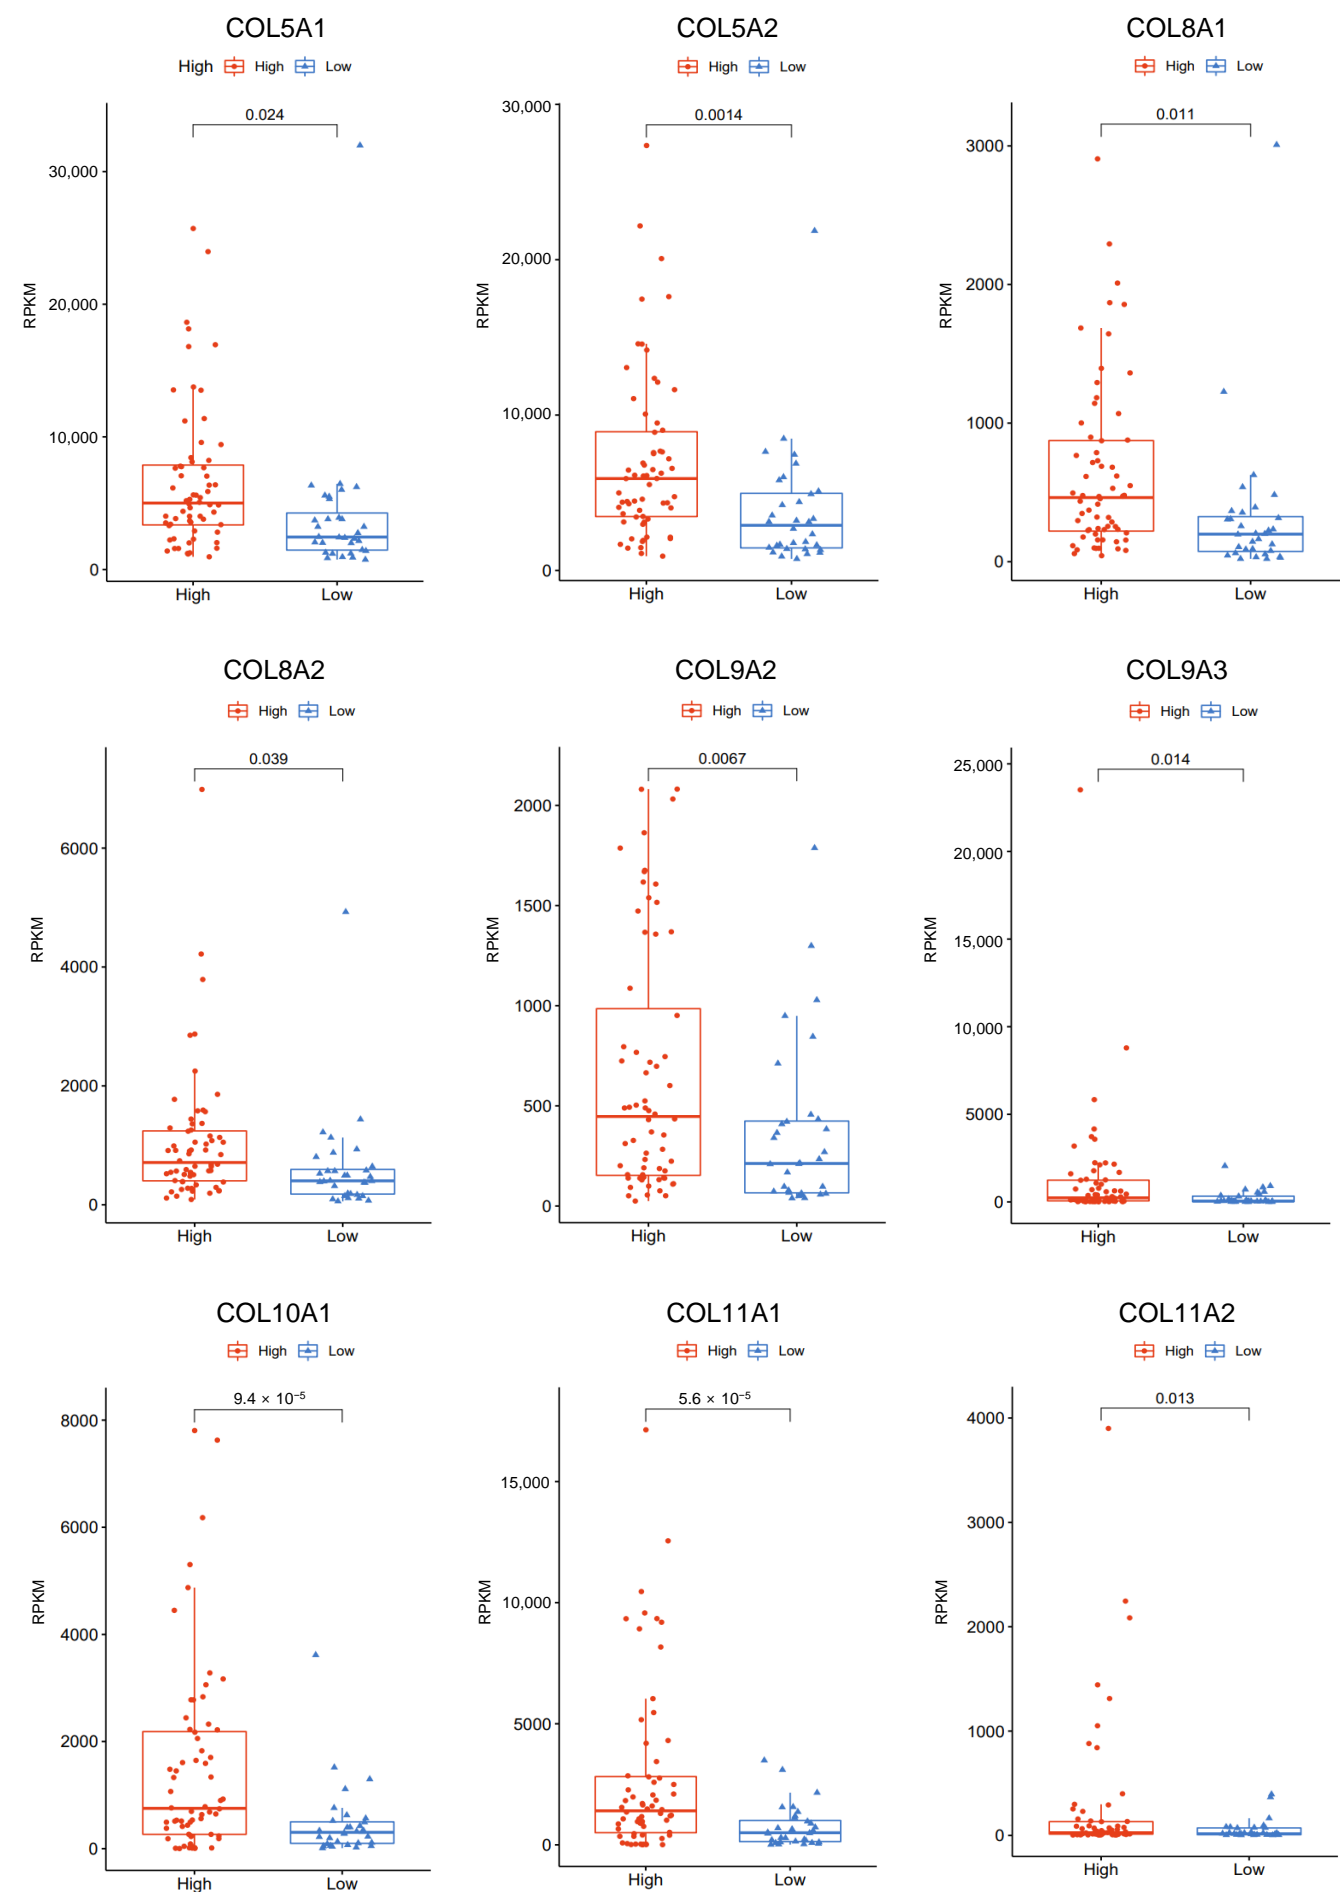



Supplementary Figure S4

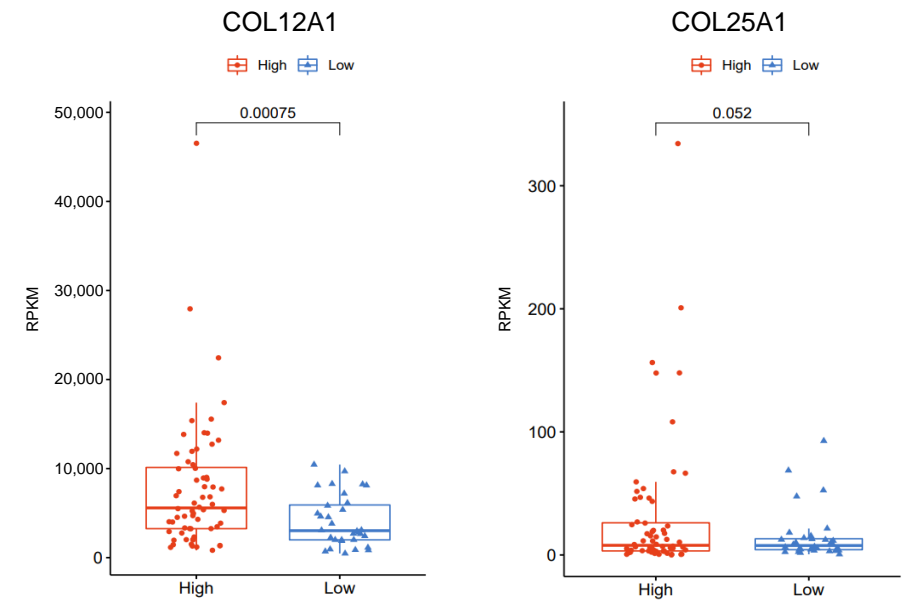

Figure S4. The expression of cell motility related genes in CTGF high and low group. Genes involving in migration related pathways based on transcriptomic analysis from TCGA BRCA patients.
